# Supplementary material for: Luteolin alleviates inflammation and autophagy of hippocampus induced by cerebral ischemia/reperfusion by activating PPAR gamma in rats
Source: PubMed Central journal article supplement (PMC9248165; doi:10.1186/s12906-022-03652-8), 2022-07-01

Figure 6  
p-PPAR-gamma

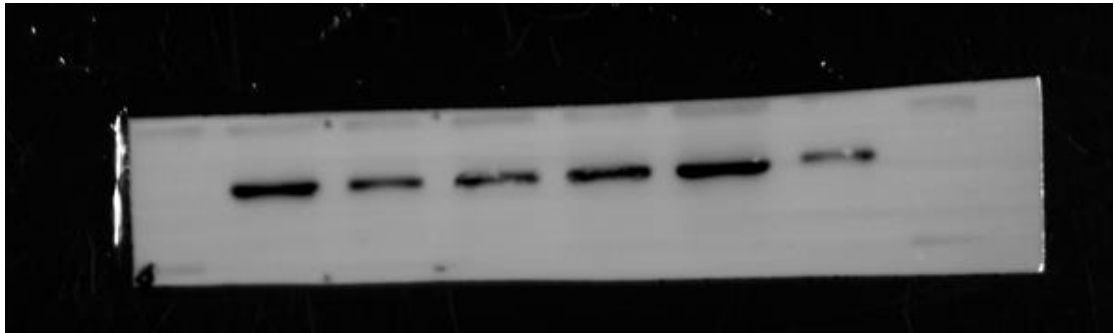

LC3

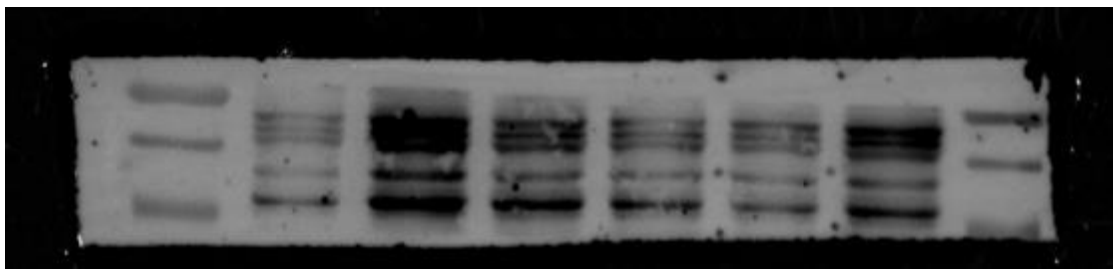

p-NF-kBp65

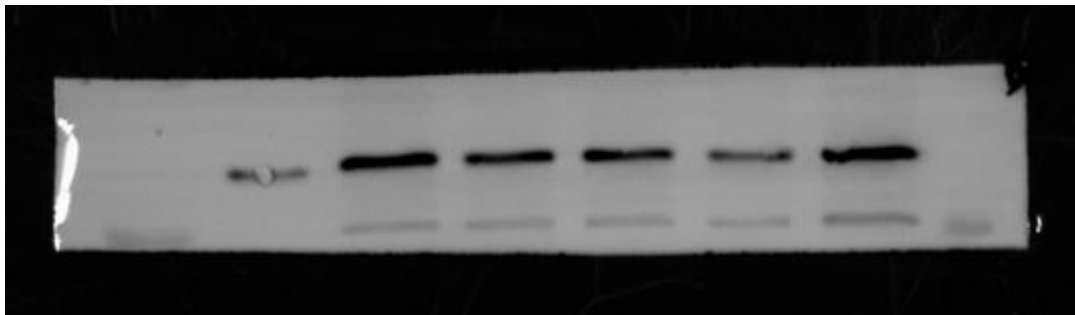

GAPDH

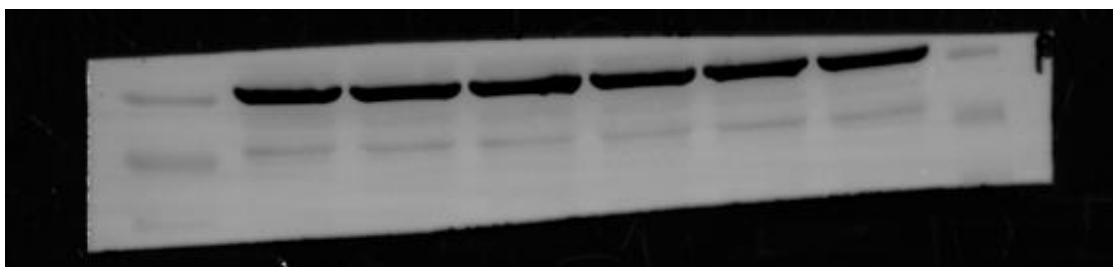

Supplement: 12906_2022_3652_MOESM1_ESM.pdf [file 12906_2022_3652_MOESM1_ESM.pdf]
